# Supplementary material for: Global, regional, and national mortality of tuberculosis attributable to alcohol and tobacco from 1990 to 2019: A modelling study based on the Global Burden of Disease study 2019
Source: PubMed Central journal article supplement (PMC10767425; doi:10.7189/jogh.14.04023), 2024-01-05
Supplement: jogh-14-04023-s001.pdf [file jogh-14-04023-s001.pdf]

# Online Supplementary Document

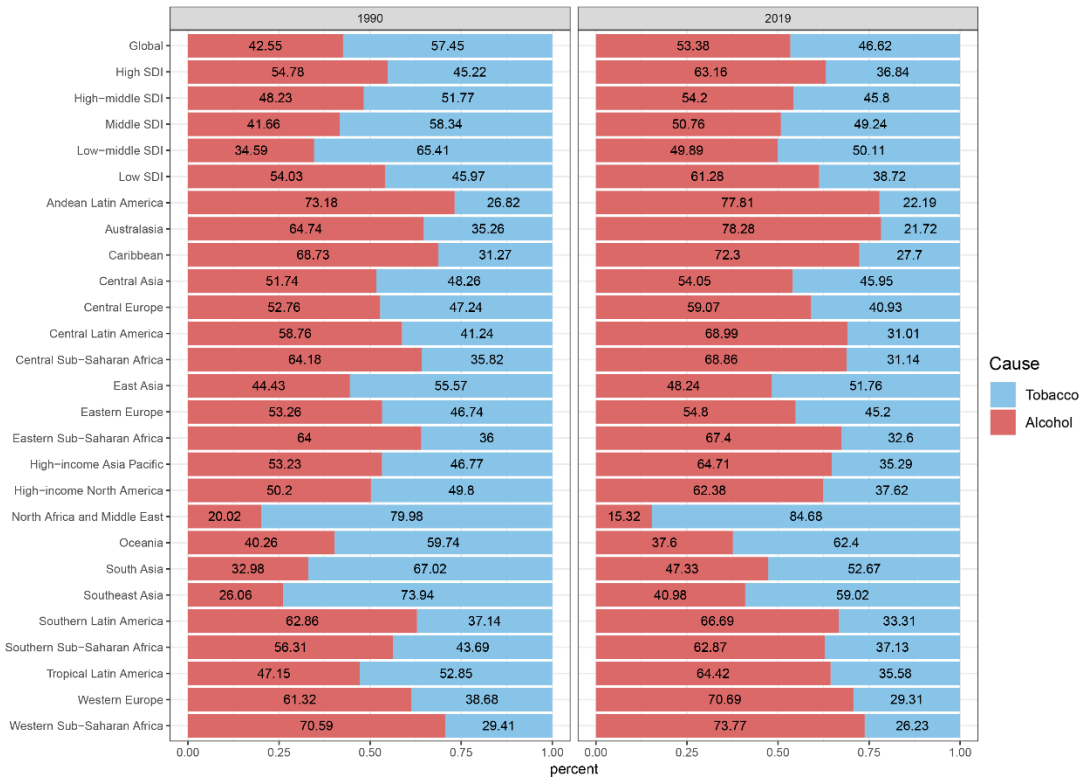

**Figure S1** Composition chart of TB deaths related with alcohol and tobacco in 1990 and 2019.

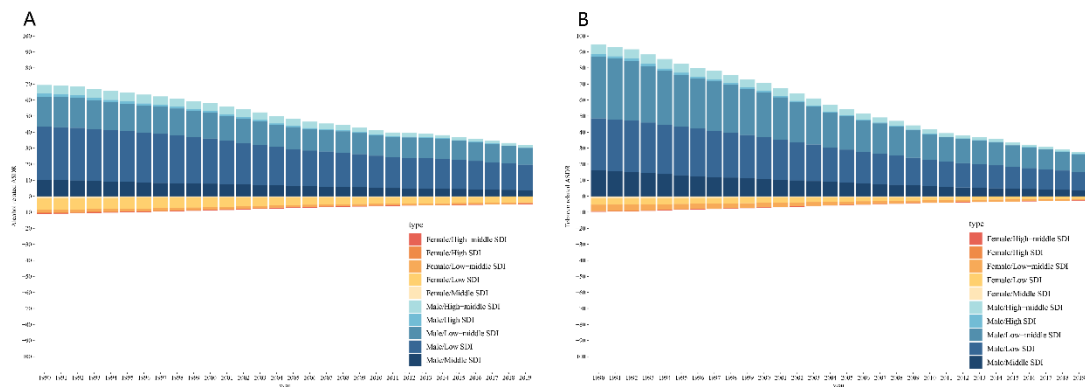

**Figure S2 A:** Alcohol-related ASDR distribution in different SDI area and gender; **B:** Tobacco-related ASDR distribution in different SDI area and gender.

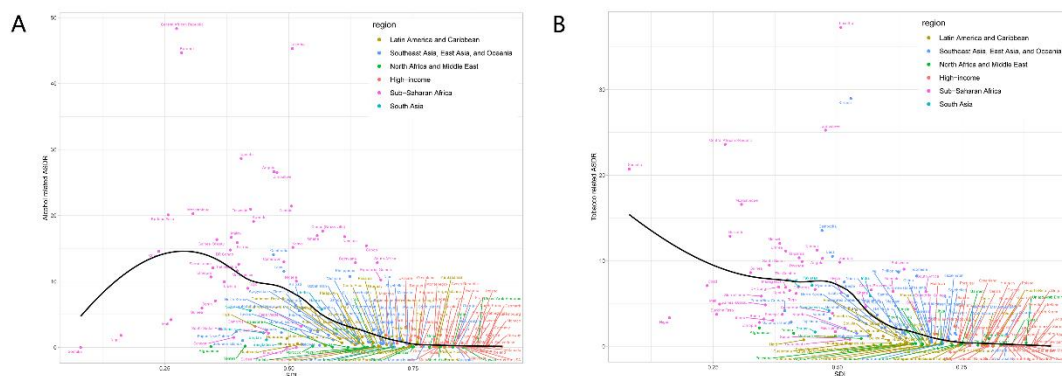

**Figure S3 A:** Alcohol-related correlation between SDI and ASDR in country level; **B:** Tobacco-related correlation between SDI and ASDR in country level.

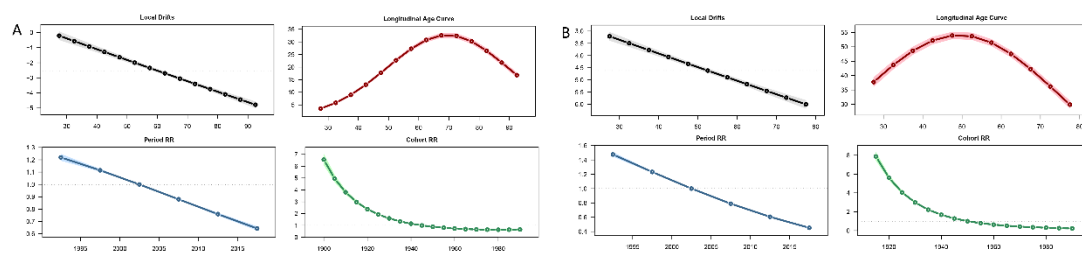

**Figure S4 A:** Alcohol-related ASDR APC model; **B:** Tobacco-related ASDR APC model.

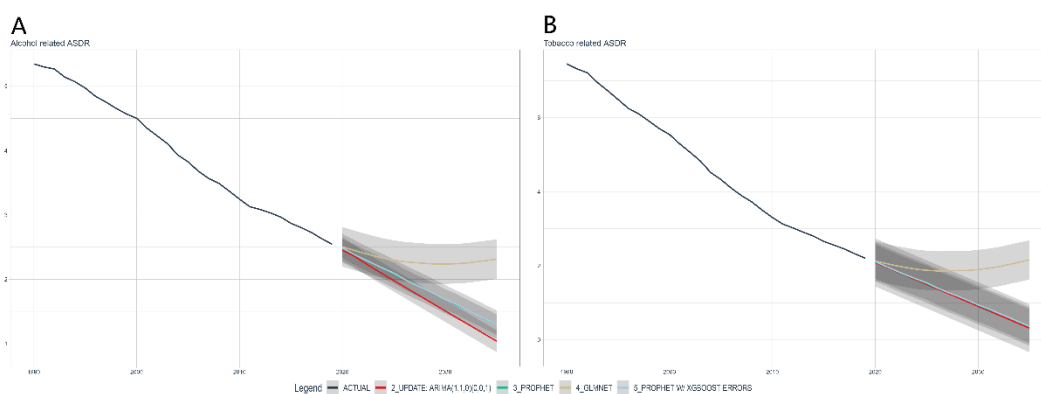

**Figure S5 A:** Machine learning prediction in alcohol related ASDR; **B:** Machine learning prediction in tobacco related YLLs.
